# Supplementary material for: Anti-fouling activity and toxicity of the Mediterranean alien sponge Paraleucilla magna Klautau, Monteiro & Borojevic, 2004 (Porifera, Calcarea)
Source: PeerJ. 2021 Oct 22;9:e12279. doi: 10.7717/peerj.12279 (PMC8544254; doi:10.7717/peerj.12279)
Supplement: Supplemental Information 1 [file peerj-09-12279-s001.xlsx]

## Sheet: mussels
	Mytilus galloprovincialis			0	100
	% adhered mussels									test1
			sampling time								sampling time
	extract concentrations (µg/mL)	# sample	0	24	48	72				extract concentrations (µg/mL)	24 h	48 h	72 h
	0	1	0	100	100	100				0	100	100	100
	0	2	0	100	100	100				0.1	100	100	100
	0	3	0	100	100	100				1	100	100	100
	0	4	0	100	100	100				50	100	100	100
	0	5	0	100	100	100				100	100	100	100
	0	6	0	100	100	100				300	66.6667	66.6667	66.6667
	0.1	1	0	100	100	100
	0.1	2	0	100	100	100
	0.1	3	0	100	100	100
	1	1	0	100	100	100
	1	2	0	100	100	100
	1	3	0	100	100	100				test2	sampling time
	50	1	0	100	100	100				extract concentrations (µg/mL)	24 h	48 h	72 h
	50	2	0	100	100	100				0	100	100	100
	50	3	0	100	100	100				200	100	100	100
	100	1	0	100	100	100				300	66.6667	66.6667	66.6667
	100	2	0	100	100	100				400	0	0	0
	100	3	0	100	100	100
	200	1	0	100	100	100
	200	2	0	100	100	100
	200	3	0	100	100	100
	300	1	0	0	0	0
	300	2	0	100	100	100
	300	3	0	100	100	100
	300	4	0	0	0	0
	300	5	0	100	100	100
	300	6	0	100	100	100
	400	1	0	0	0	0
	400	2	0	0	0	0
	400	3	0	0	0	0

## Sheet: artemia
	Mytilus galloprovincialis			0	100
	# live nauplii					% live nauplii								test1
			sampling time						test1
	extract concentrations (µg/mL)	# sample	0	24	48	24	48			sampling time					24 h	SE	48 h	SE
	0	1	4	4	4	100	100		extract concentrations (µg/mL)	24 h	48 h			0	100	0	100	0
	0	2	4	4	4	100	100		0	100	100			0.1	100	0	100	0
	0	3	4	4	4	100	100		0.1	100	100			1	100	0	100	0
	0	4	4	4	4	100	100		1	100	100			50	100	0	92	8.33333
	0	5	4	4	4	100	100		50	100	91.6667			100	100	0	92	8.33333
	0	6	4	4	4	100	100		100	100	91.6667			300	100	0	75	0
	0.1	1	4	4	4	100	100		300	100	75
	0.1	2	4	4	4	100	100
	0.1	3	4	4	4	100	100
	1	1	4	4	4	100	100
	1	2	4	4	4	100	100
	1	3	4	4	4	100	100
	50	1	4	4	4	100	100		test2	sampling time				test2
	50	2	4	4	4	100	100		extract concentrations (µg/mL)	24 h	48 h				24 h	SE	48 h	SE
	50	3	4	4	3	100	75		0	100	100			300	100	0	58	8.33333
	100	1	4	4	3	100	75		300	100	58.3333			400	100	0	58	8.33333
	100	2	4	4	4	100	100		400	100	58.3333			500	50	0	25	14.4338
	100	3	4	4	4	100	100		500	50	25
	300	1	4	4	3	100	75
	300	2	4	4	3	100	75
	300	3	4	4	3	100	75
	300	4	4	4	3	100	75
	300	5	4	4	2	100	50
	300	6	4	4	2	100	50
	400	1	4	4	2	100	50
	400	2	4	4	3	100	75
	400	3	4	4	2	100	50
	500	1	4	2	0	50	0
	500	2	4	2	2	50	50
	500	3	4	2	1	50	25

## Sheet: microalgae
		NANNOCHLOROPSIS							TETRASELMIS
			media	ds	es				media	ds	es
	6.5	650000	630000	28284.3	20000		3.9	390000	375000	21213.2	15000
	6.1	610000					3.6	360000
	4.7	470000	450000	28284.3	20000		5	500000	440000	84852.8	60000
	4.3	430000					3.8	380000
	1.2	1200000	1350000	212132	150000		1.1	1100000	1050000	70710.7	50000
	1.5	1500000					1	1000000
	4.5	450000	450000	0	0		3	300000	360000	84852.8	60000
	4.5	450000					4.2	420000
	1.6	1600000	1750000	212132	150000		8.8	880000	820000	84852.8	60000
	1.9	1900000					7.6	760000
	7.5	750000	660000	127279	90000		3.3	330000	300000	42426.4	30000
	5.7	570000					2.7	270000
				NANNOCHLOROPSIS						TETRASELMIS
				0	24	96	120			0	24	96	120
			C	500000	630000	1350000	1750000		C	500000	375000	1050000	820000
			T	500000	450000	450000	660000		T	500000	440000	360000	300000
		10^5		0	24	96	120			0	24	96	120
			C	50	63	135	175		C	50	37.5	105	82
			T	50	45	45	66		T	50	44	36	30
		es	C	0	0.2	1.5	1.5		C	0	0.15	0.5	0.6
			T	0	0.2	0	0.9		T	0	0.6	0.6	0.3

## Sheet: NAUPLII
cod	percentage
1_C_C0_T0	100
1_C_C0_T1	100
1_C_C0_T2	100
2_C_C0_T0	100
2_C_C0_T1	100
2_C_C0_T2	100
3_C_C0_T0	100
3_C_C0_T1	100
3_C_C0_T2	100
1_C_C0.1_T0	100
1_C_C0.1_T1	100
1_C_C0.1_T2	100
2_C_C0.1_T0	100
2_C_C0.1_T1	100
2_C_C0.1_T2	100
3_C_C0.1_T0	100
3_C_C0.1_T1	100
3_C_C0.1_T2	100
1_C_C1_T0	100
1_C_C1_T1	100
1_C_C1_T2	100
2_C_C1_T0	100
2_C_C1_T1	100
2_C_C1_T2	100
3_C_C1_T0	100
3_C_C1_T1	100
3_C_C1_T2	100
1_C_C50_T0	100
1_C_C50_T1	100
1_C_C50_T2	100
2_C_C50_T0	100
2_C_C50_T1	100
2_C_C50_T2	100
3_C_C50_T0	100
3_C_C50_T1	100
3_C_C50_T2	75
1_C_C100_T0	100
1_C_C100_T1	100
1_C_C100_T2	75
2_C_C100_T0	100
2_C_C100_T1	100
2_C_C100_T2	100
3_C_C100_T0	100
3_C_C100_T1	100
3_C_C100_T2	100
1_C_C300_T0	100
1_C_C300_T1	100
1_C_C300_T2	75
2_C_C300_T0	100
2_C_C300_T1	100
2_C_C300_T2	75
3_C_C300_T0	100
3_C_C300_T1	100
3_C_C300_T2	75
4_C_C300_T0	100
4_C_C300_T1	100
4_C_C300_T2	75
5_C_C300_T0	100
5_C_C300_T1	100
5_C_C300_T2	50
6_C_C300_T0	100
6_C_C300_T1	100
6_C_C300_T2	50
1_C_C400_T0	100
1_C_C400_T1	100
1_C_C400_T2	75
2_C_C400_T0	100
2_C_C400_T1	100
2_C_C400_T2	50
3_C_C400_T0	100
3_C_C400_T1	100
3_C_C400_T2	50
1_C_C500_T0	100
1_C_C500_T1	50
1_C_C500_T2	0
2_C_C500_T0	100
2_C_C500_T1	50
2_C_C500_T2	50
3_C_C500_T0	100
3_C_C500_T1	50
3_C_C500_T2	25

## Sheet: NANNO
Nanno	cell
1_N_C0_T0	500000
1_N_C0_T1	650000
1_N_C0_T2	1220000
1_N_C0_T3	1610000
2_N_C0_T0	500000
2_N_C0_T1	610000
2_N_C0_T2	1490000
2_N_C0_T3	1850000
1_N_C300_T0	500000
1_N_C300_T1	470000
1_N_C300_T2	450000
1_N_C300_T3	745000
2_N_C300_T0	500000
2_N_C300_T1	430000
2_N_C300_T2	445000
2_N_C300_T3	573000

## Sheet: TETRA
T. suecica	CELL
1_N_C0_T0	500000
1_N_C0_T1	390000
1_N_C0_T2	1100000
1_N_C0_T3	875000
2_N_C0_T0	500000
2_N_C0_T1	360000
2_N_C0_T2	1000000
2_N_C0_T3	760000
1_N_C300_T0	500000
1_N_C300_T1	500000
1_N_C300_T2	300000
1_N_C300_T3	330000
2_N_C300_T0	500000
2_N_C300_T1	380000
2_N_C300_T2	420000
2_N_C300_T3	270000
